# Supplementary material for: Phytophthora Communities Associated with Agathis australis (kauri) in Te Wao Nui o Tiriwa/Waitākere Ranges, New Zealand
Source: Preprints.org preprint supplement (doi:10.20944/preprints202403.0643.v1), 2024-03-11
Supplement: Supplementary file 1 [file supplementary]

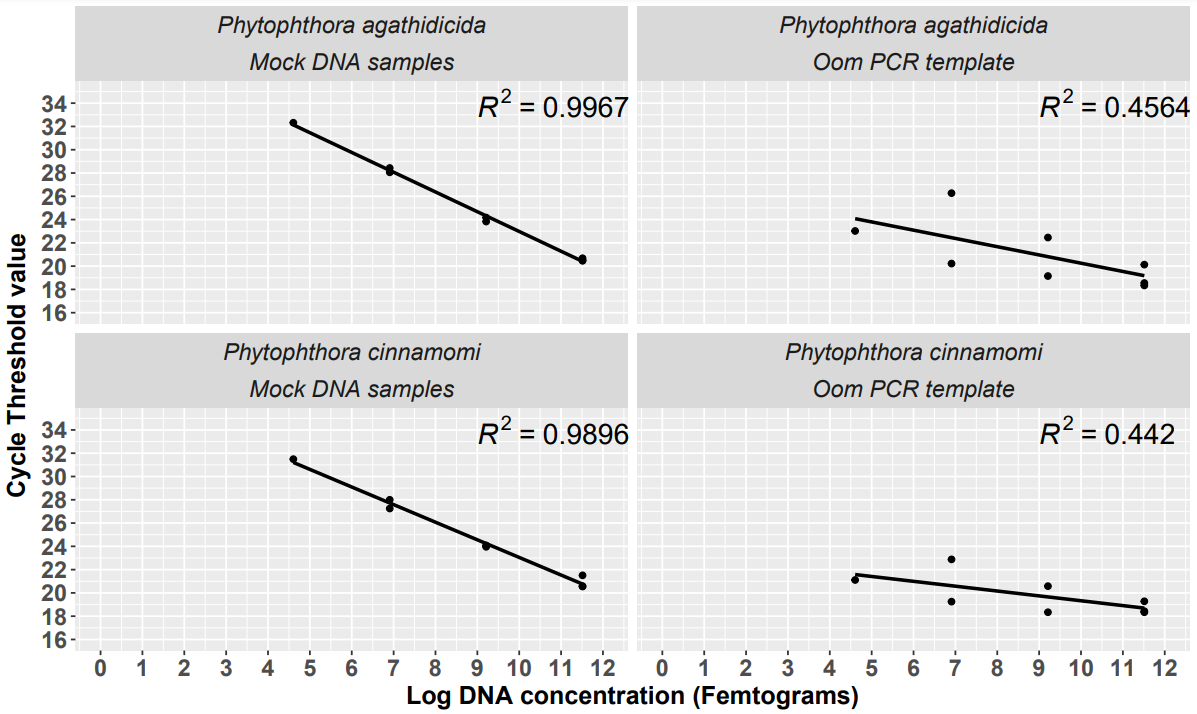


**Supplementary Materials Figure S1** Relationship between the DNA concentration (log femtograms) of the spiked mock community samples (for the ITS metabarcoding) and the cycle threshold (Cq) values in the multiplexed qPCR validation for *Phytophthora agathidicida* and *P. cinnamomi*. ‘Mock DNA samples’ shows the Cq values of the neat spiked eDNA samples as template and ‘Oom PCR template’ shows the Cq values when 1:100,000 dilutions of the oomycete specific PCR product (amplified with ITS primers oom18s/ITS7 for the primary metabarcoding PCR) was used as template in a qPCR.
